# Supplementary material for: Myeloid/Microglial Driven Autologous Hematopoietic Stem Cell Gene Therapy Corrects a Neuronopathic Lysosomal Disease
Source: PubMed Central journal article supplement — Mol Ther. 2013 Jul 16;21(10):1938–49. doi: 10.1038/mt.2013.141 (PMC3808137; doi:10.1038/mt.2013.141), 2013-07-16

# Supplementary Figure 1

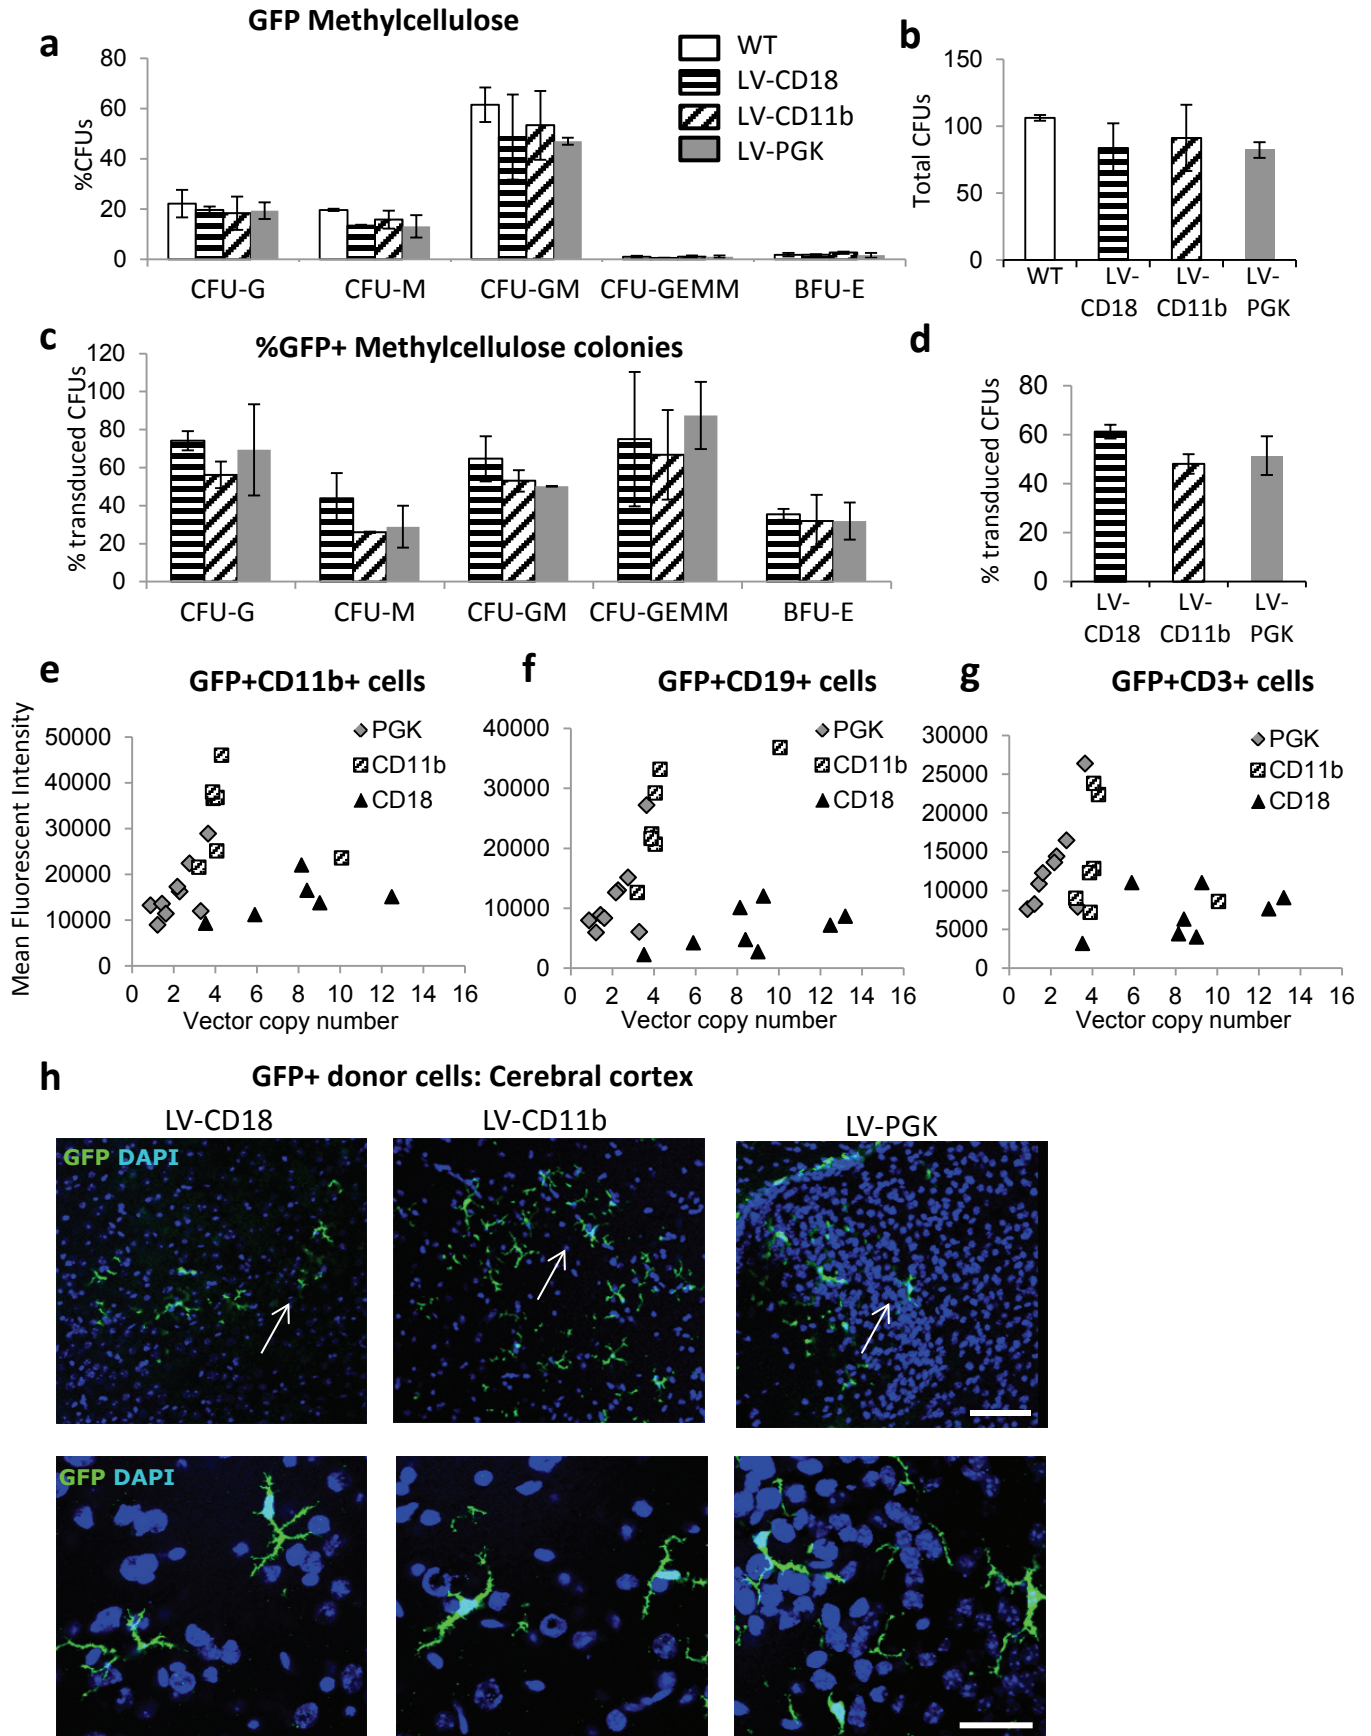

# Supplementary Figure 2

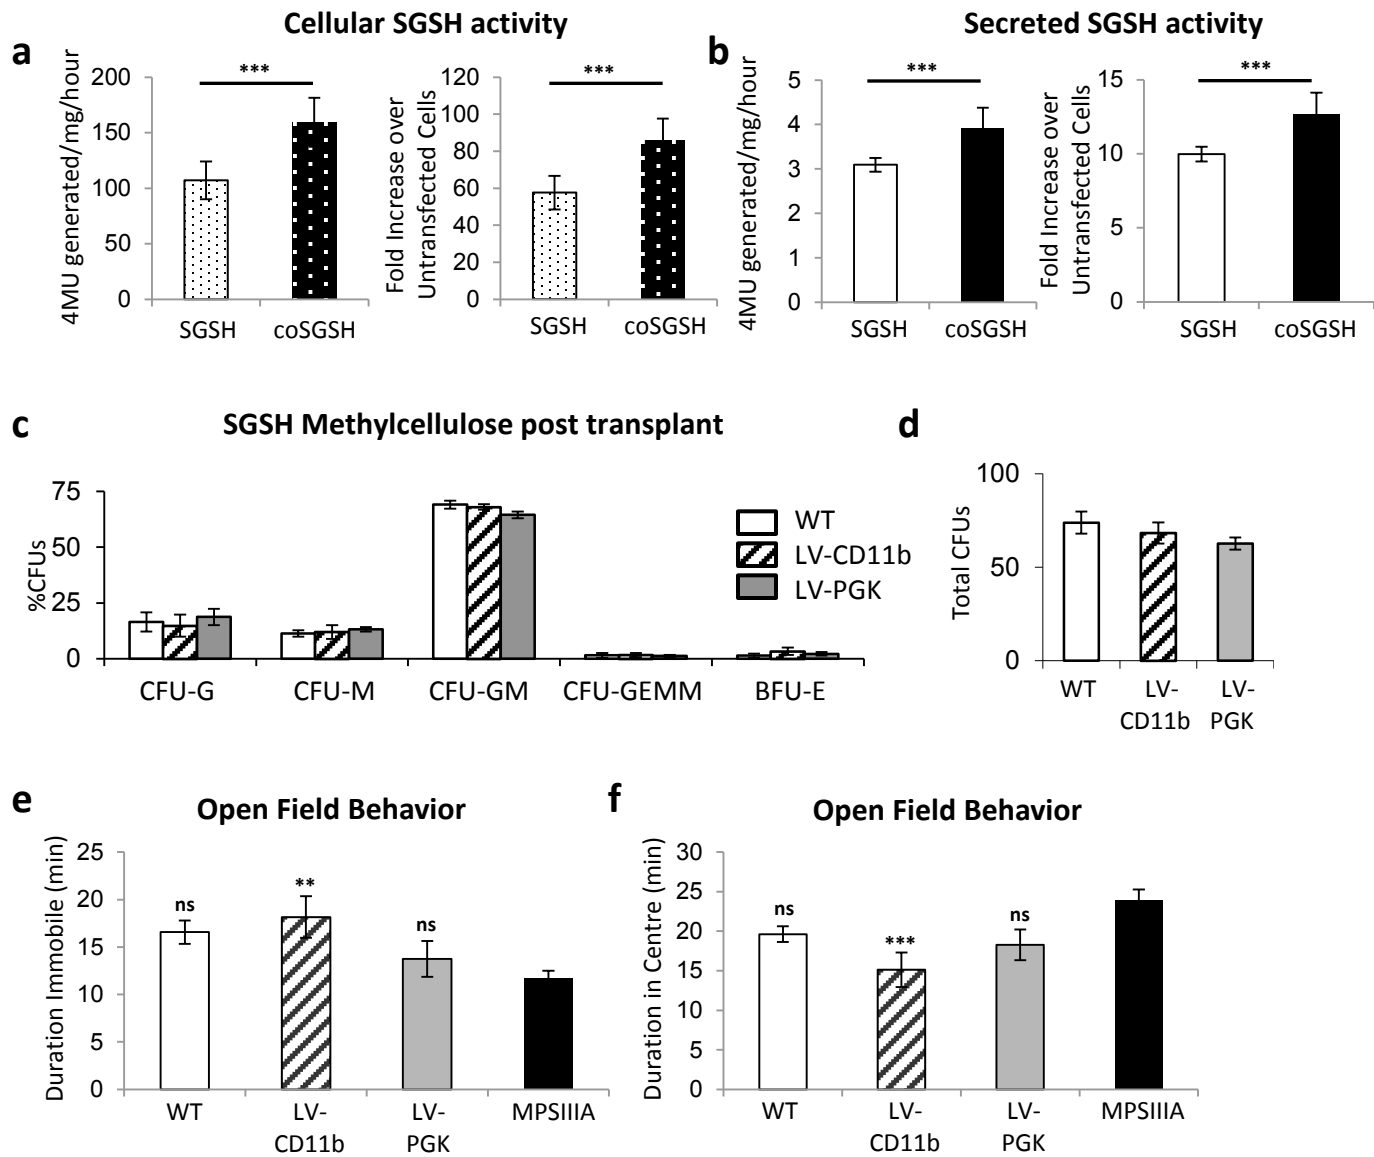



# Supplementary Figure 3

## Sections 1-4 Isolectin B4

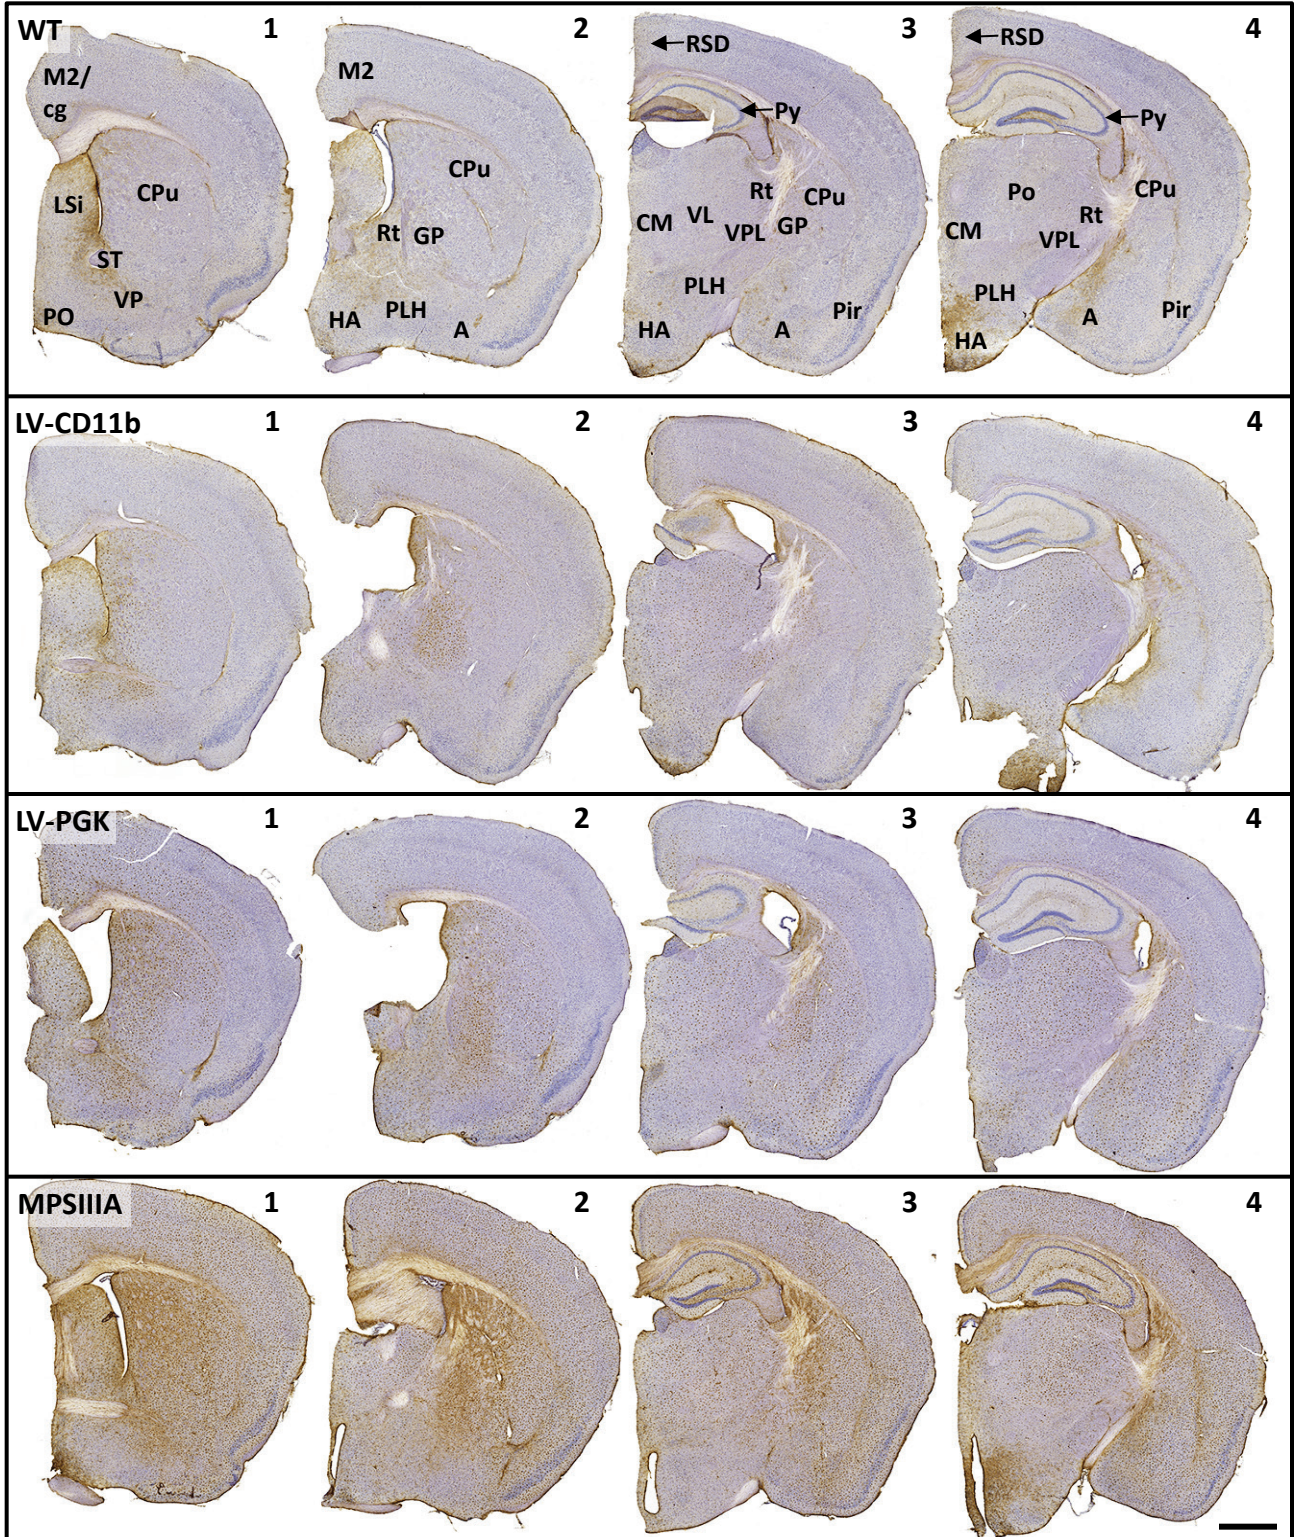

# Supplementary Figure 4

## Sections 1-4 GM2 Ganglioside

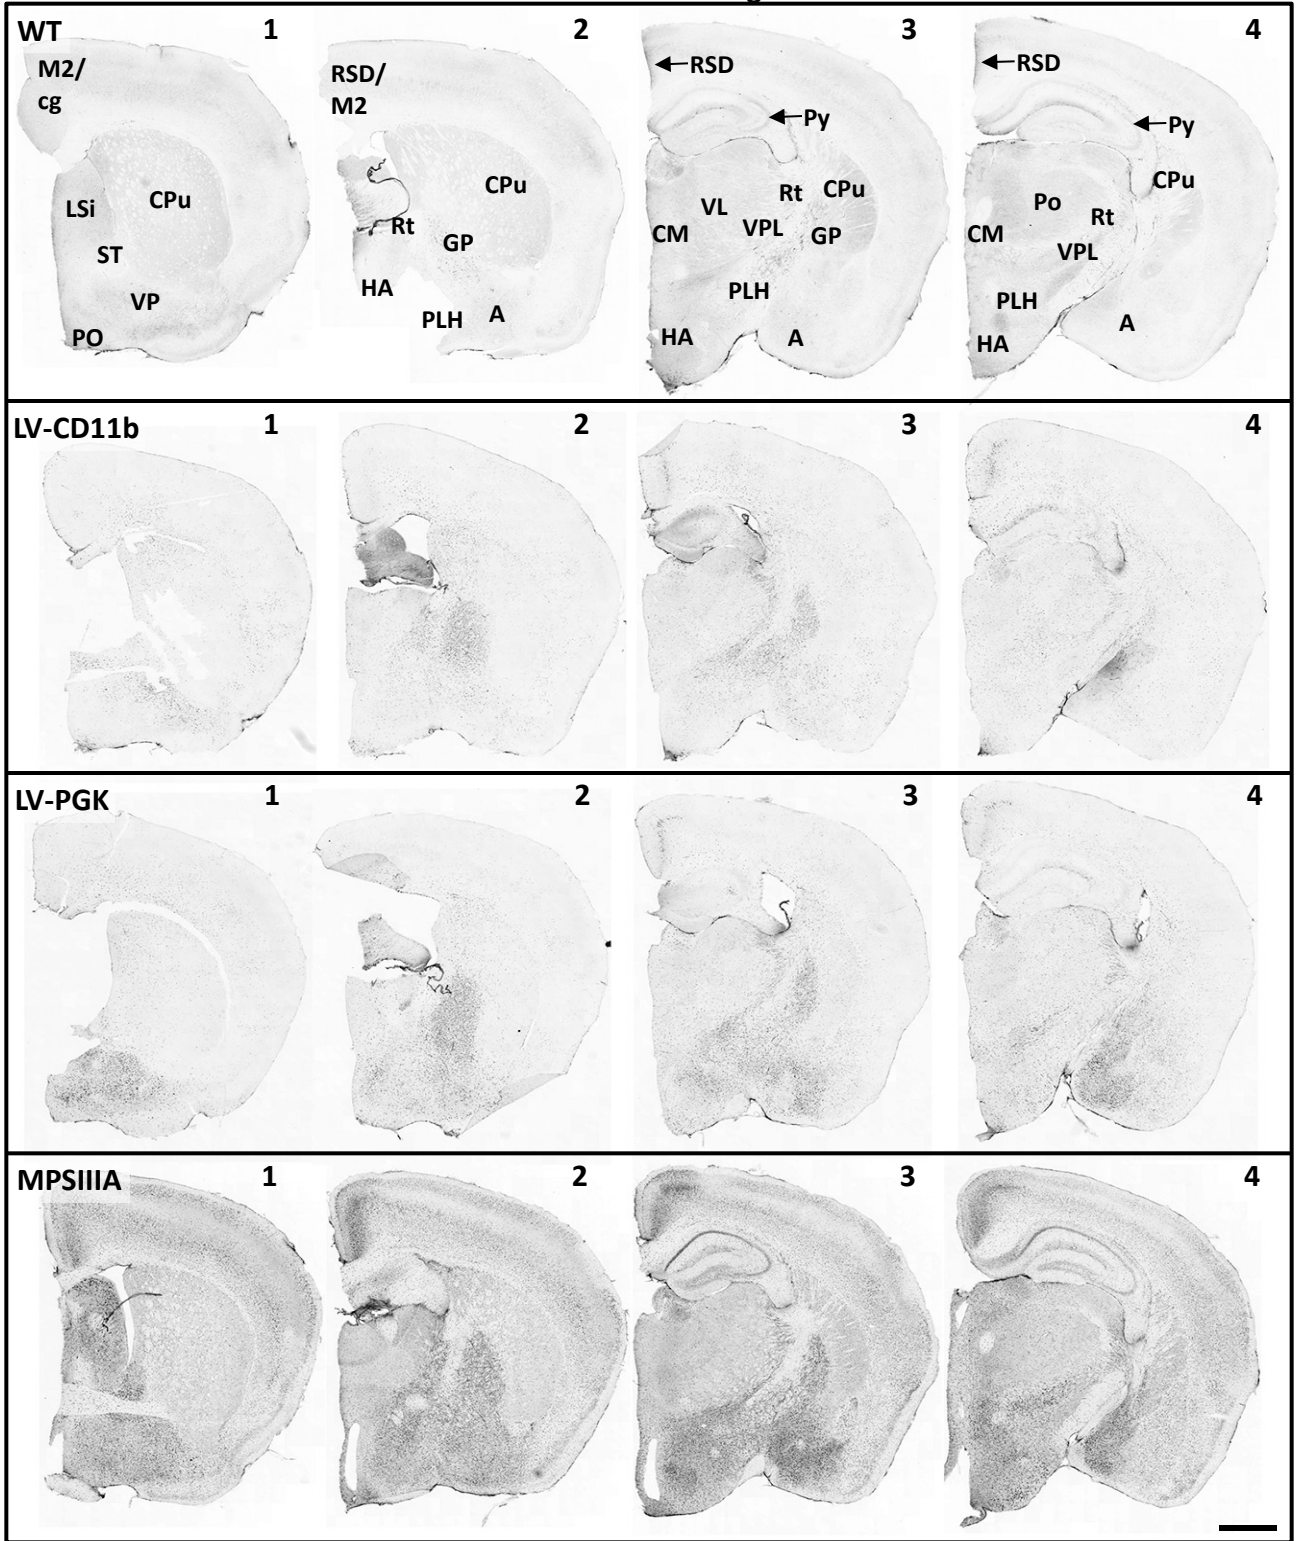

Supplement: mt2013141x1.pdf [file mt2013141x1.pdf]
